# Supplementary material
Source: publisher site journal article supplement (https://www.dovepress.com/article/339066)
Supplement: Supplementary file 1 [file get_supplementary_file.php]

Supplementary materials

Xuan Chen et al

# **Prevalence of Abdominal Obesity in Chinese Middle-Aged and Older Adults with a Normal Body Mass Index and Its Association with Type 2 Diabetes Mellitus: a Nationally Representative Cohort Study from 2011 to 2018**

Xuan Chen<sup>1</sup>, Mingrui Duan<sup>1,2</sup>, Rui Hou<sup>1,2</sup>, Manqi Zheng<sup>1,2</sup>, Haibin Li<sup>3</sup>, Manjot Singh<sup>4,5</sup>,  
Changwei Li<sup>6</sup>, Kuo Liu<sup>1,2</sup>, Feng Zhang<sup>1,2</sup>, Xinghua Yang<sup>1,2</sup>, Yanxia Luo<sup>1,2</sup>, Yan He<sup>1,2</sup>,  
Lijuan Wu<sup>1,2</sup>, Deqiang Zheng<sup>1,2,7</sup>

<sup>1</sup>Department of Epidemiology and Health Statistics, School of Public Health, Capital Medical University, Beijing, People's Republic of China; <sup>2</sup>Beijing Municipal Key Laboratory of Clinical Epidemiology, Capital Medical University, Beijing, People's Republic of China; <sup>3</sup>Heart Center & Beijing Key Laboratory of Hypertension, Beijing Chaoyang Hospital, Capital Medical University, Beijing, People's Republic of China; <sup>4</sup>Harry Perkins Institute of Medical Research, QEII Medical Centre, Nedlands and Centre for Medical Research, University of Western Australia, Crawley WA, Australia; <sup>5</sup>School of Medical and Health Sciences, Edith Cowan University, Joondalup WA, Australia; <sup>6</sup>Department of Epidemiology, Tulane University School of Public Health and Tropical Medicine, New Orleans, LA, USA. <sup>7</sup>Center for Primary Health Care Research, Lund University/Region Skåne, Malmö, Sweden

Correspondence to:

Deqiang Zheng

<sup>1</sup>Department of Epidemiology and Health Statistics, School of Public Health, Capital Medical University, 10 Xitoutiao, Youanmen, Fengtai District, Beijing 100069, People's Republic of China.

Tel +86 10 8391 1497

Fax +86 10 8391 1497

Email dqzheng@ccmu.edu.cn

Lijuan Wu

Department of Epidemiology and Health Statistics, School of Public Health, Capital Medical University, 10 Xitoutiao, Youanmen, Fengtai District, Beijing 100069, People's Republic of China.

Tel +86 10 8391 1497

Fax +86 10 8391 1497

Email xiaowu@ccmu.edu.cn

### **Supplementary Tables: 4**

Table S1. Prevalence of Abdominal Obesity Defined by Waist Circumference

Table S2. Prevalence of Abdominal Obesity Defined by Waist-to-height Ratio

Table S3. Incidence of T2DM and Hazard Ratios (95% CI) of Waist-to-height Ratio in the Cox Proportional-hazards Model

Table S4. Incidence of T2DM and Hazard Ratios (95% CI) of Normal and Abdominal Obesity in the Cox Proportional-hazards Model

### **Supplementary Figures: 3**

Figure S1. The prevalence of abdominal obesity determined by waist-to-height ratio in subgroups of gender and age. **(A)**. Prevalence of abdominal obesity defined by waist-to-height ratio in different genders. **(B)**. Prevalence of abdominal obesity defined by waist-to-height ratio in different age groups.

Figure S2. Bee swarm plots of the distribution of waist-to-height ratio across the subgroups. **(A)**. Bee swarm plots of the distribution of waist-to-height ratio grouped by gender. **(B)**. Bee swarm plots of the distribution of waist-to-height ratio in T2DM patients and participants without T2DM.

Figure S3. The Kaplan-Meier unadjusted survival estimates for different waist-to-height ratio groups.

**Table S1 Prevalence of Abdominal Obesity Defined by Waist Circumference**

| Variable           | Normal WC |                        | Increased WC |                        | Substantially Increased WC |                        |
|--------------------|-----------|------------------------|--------------|------------------------|----------------------------|------------------------|
|                    | No.       | Prevalence, % (95% CI) | No.          | Prevalence, % (95% CI) | No.                        | Prevalence, % (95% CI) |
| <b>General</b>     | 4758      | 59.9 (58.8-60)         | 1745         | 22.0 (21.1-22.9)       | 1439                       | 18.1 (17.3-19.0)       |
| <b>Gender</b>      |           |                        |              |                        |                            |                        |
| Men                | 4099      | 72.6 (71.3-74.0)       | 761          | 17.8 (16.7-19.0)       | 407                        | 9.5 (8.7-10.4)         |
| Women              | 1659      | 45.1 (43.5-46.8)       | 984          | 26.8 (25.3-28.2)       | 1032                       | 28.1 (26.6-29.5)       |
| <b>Age, years</b>  |           |                        |              |                        |                            |                        |
| 45-50              | 985       | 66.0 (63.6-68.4)       | 331          | 22.2 (20.1-24.3)       | 177                        | 11.9 (10.2-13.5)       |
| 50-55              | 744       | 62.5 (59.7-65.2)       | 275          | 23.1 (20.7-25.5)       | 172                        | 14.4 (12.5-16.4)       |
| 55-60              | 1072      | 61.6 (59.4-63.9)       | 367          | 21.1 (19.2-23.0)       | 300                        | 17.3 (15.5-19.0)       |
| 60-65              | 767       | 58.5 (55.8-61.2)       | 305          | 23.3 (21.0-25.6)       | 239                        | 18.2 (16.1-20.3)       |
| 65-70              | 551       | 60.1 (56.9-63.3)       | 184          | 20.1 (17.5-22.7)       | 182                        | 19.9 (17.3-22.4)       |
| ≥70                | 639       | 49.5 (46.8-52.2)       | 283          | 21.9 (19.7-24.2)       | 369                        | 28.6 (26.1-31.1)       |
| <b>T2DM status</b> |           |                        |              |                        |                            |                        |
| T2DM               | 345       | 45.0 (41.5-48.6)       | 221          | 28.9 (15.6-32.1)       | 200                        | 26.1 (23.0-29.2)       |
| Without T2DM       | 4389      | 61.5 (60.4-62.6)       | 1514         | 21.2 (20.3-22.2)       | 1232                       | 17.3 (16.4-18.1)       |

**Abbreviations:** WC, waist circumference; T2DM, type 2 diabetes mellitus

Table S2 Prevalence of Abdominal Obesity Defined by Waist-to-height Ratio

| Variable           | Normal WHtR |                        | Increased WHtR |                        | Substantially Increased WHtR |                        |
|--------------------|-------------|------------------------|----------------|------------------------|------------------------------|------------------------|
|                    | No.         | Prevalence, % (95% CI) | No.            | Prevalence, % (95% CI) | No.                          | Prevalence, % (95% CI) |
| <b>General</b>     | 3353        | 42.2 (41.1-43.3)       | 2319           | 29.2 (28.2-30.2)       | 2270                         | 28.6 (27.6-29.6)       |
| <b>Gender</b>      |             |                        |                |                        |                              |                        |
| Men                | 2358        | 55.3 (53.8-56.8)       | 826            | 19.4 (18.2-20.5)       | 1083                         | 25.4 (24.1-26.7)       |
| Women              | 995         | 27.1 (25.6-28.5)       | 1493           | 40.6 (39.0-42.2)       | 1187                         | 32.3 (30.8-33.8)       |
| <b>Age, years</b>  |             |                        |                |                        |                              |                        |
| 45-50              | 797         | 53.4 (50.9-55.9)       | 472            | 31.6 (29.3-34.0)       | 224                          | 15.0 (13.2-16.8)       |
| 50-55              | 570         | 47.9 (45.0-50.7)       | 364            | 30.6 (28.0-33.2)       | 257                          | 21.6 (19.2-23.9)       |
| 55-60              | 752         | 43.2 (40.9-45.6)       | 563            | 32.4 (30.2-34.6)       | 424                          | 24.4 (22.4-26.4)       |
| 60-65              | 535         | 40.8 (38.2-43.5)       | 383            | 29.2 (26.8-31.7)       | 393                          | 30.0 (27.5-32.5)       |
| 65-70              | 347         | 37.8 (34.7-41.0)       | 243            | 26.5 (23.6-29.4)       | 327                          | 35.7 (32.6-38.8)       |
| ≥70                | 352         | 27.3 (24.8-29.7)       | 294            | 22.8 (20.5-25.1)       | 645                          | 50.0 (47.2-52.7)       |
| <b>T2DM status</b> |             |                        |                |                        |                              |                        |
| T2DM               | 223         | 29.1 (25.9-32.3)       | 233            | 30.4 (27.2-33.7)       | 310                          | 40.5 (37.0-44.0)       |
| Without T2DM       | 3117        | 43.7 (42.5-44.8)       | 2072           | 29.0 (28.0-30.1)       | 1946                         | 27.3 (26.2-28.3)       |

**Abbreviations:** WHtR, waist-to-height ratio; T2DM, type 2 diabetes mellitus

**Table S3 Incidence of T2DM and Hazard Ratios (95% CI) of Waist-to-height Ratio for Different Subgroups in the Cox Proportional-hazards Model**

|                             | Waist-to-height Ratio |                  |                         |
|-----------------------------|-----------------------|------------------|-------------------------|
|                             | Normal                | Increased        | Substantially increased |
| <b>General (n=4348)</b>     |                       |                  |                         |
| No of subjects              | 1888                  | 1305             | 1155                    |
| No of T2DM cases            | 108                   | 111              | 131                     |
| Person-years                | 12034.7               | 8261.8           | 6977.5                  |
| Incidence rate <sup>a</sup> | 9.0                   | 13.4             | 18.8                    |
| HR (95% CI)                 | 1.00                  | 1.37 (1.03-1.83) | 1.70 (1.26-2.30)        |
| <b>Men (n=2238)</b>         |                       |                  |                         |
| No of subjects              | 1281                  | 440              | 517                     |
| No of T2DM cases            | 79                    | 31               | 52                      |
| Person-years                | 8124.1                | 2798.0           | 3157.8                  |
| Incidence rate <sup>a</sup> | 9.7                   | 11.1             | 16.5                    |
| HR (95% CI)                 | 1.00                  | 1.05 (0.68-1.62) | 1.36 (0.91-2.05)        |
| <b>Women (n=2110)</b>       |                       |                  |                         |
| No of subjects              | 607                   | 865              | 638                     |
| No of T2DM cases            | 29                    | 80               | 79                      |
| Person-years                | 3910.6                | 5463.9           | 3819.7                  |
| Incidence rate <sup>a</sup> | 7.4                   | 14.6             | 20.7                    |
| HR (95% CI)                 | 1.00                  | 1.80 (1.16-2.80) | 2.27 (1.40-3.68)        |
| <b>Prediabetes (n=1901)</b> |                       |                  |                         |
| No of subjects              | 786                   | 563              | 552                     |
| No of T2DM cases            | 59                    | 64               | 82                      |
| Person-years                | 5010.7                | 3529.0           | 3300.6                  |
| Incidence rate <sup>a</sup> | 11.8                  | 18.1             | 24.8                    |
| HR (95% CI)                 | 1.00                  | 1.52 (1.04-2.24) | 1.95(1.31-2.89)         |
| <b>NGT (n=2447)</b>         |                       |                  |                         |
| No of subjects              | 1102                  | 742              | 603                     |
| No of T2DM cases            | 49                    | 47               | 49                      |
| Person-years                | 7024.0                | 4732.8           | 3676.9                  |
| Incidence rate <sup>a</sup> | 7.0                   | 9.9              | 13.3                    |
| HR (95% CI)                 | 1.00                  | 1.18 (0.76-1.82) | 1.40 (0.88-2.25)        |

**Notes:** <sup>a</sup> 1000 person-year. Model: Adjusted for age, sex, body mass index, district, educational level, smoking consumption, drinking status, systolic blood pressure, diastolic blood pressure, total cholesterol, triglycerides, high-density lipoprotein cholesterol, low-density lipoprotein cholesterol and HbA<sub>1c</sub>.

**Abbreviations:** HR, hazard ratio; NGT, normal glucose tolerance; T2DM, type 2 diabetes mellitus.

**Table S4 Incidence of T2DM and Hazard Ratios (95% CI) of Normal and Abdominal Obesity in the Cox Proportional-hazards Model**

|                             | Waist Circumference |                   | Waist-to-height Ratio |                   |
|-----------------------------|---------------------|-------------------|-----------------------|-------------------|
|                             | Normal              | Abdominal Obesity | Normal                | Abdominal Obesity |
| <b>General (n=4348)</b>     |                     |                   |                       |                   |
| No of subjects              | 2705                | 1643              | 1888                  | 2460              |
| No of T2DM cases            | 170                 | 180               | 108                   | 242               |
| Person-years                | 17180.6             | 10093.4           | 12034.7               | 15239.3           |
| Incidence rate <sup>a</sup> | 9.9                 | 17.8              | 9.0                   | 15.9              |
| HR (95% CI)                 | 1.00                | 1.59 (1.25-2.03)  | 1.00                  | 1.51 (1.16-1.96)  |
| <b>Men (n=2238)</b>         |                     |                   |                       |                   |
| No of subjects              | 1682                | 556               | 1281                  | 957               |
| No of T2DM cases            | 104                 | 58                | 79                    | 83                |
| Person-years                | 10668.8             | 3411              | 8124.1                | 5955.8            |
| Incidence rate <sup>a</sup> | 9.7                 | 17.0              | 9.7                   | 13.9              |
| HR (95% CI)                 | 1.00                | 1.52 (1.06-2.18)  | 1.00                  | 1.21 (0.85-1.71)  |
| <b>Women (n=2110)</b>       |                     |                   |                       |                   |
| No of subjects              | 1023                | 1087              | 607                   | 1503              |
| No of T2DM cases            | 66                  | 122               | 29                    | 159               |
| Person-years                | 6511.8              | 6682.4            | 3910.6                | 9283.6            |
| Incidence rate <sup>a</sup> | 10.1                | 18.3              | 7.4                   | 17.1              |
| HR (95% CI)                 | 1.00                | 1.59 (1.15-2.21)  | 1.00                  | 1.93 (1.26-2.96)  |
| <b>Prediabetes (n=1901)</b> |                     |                   |                       |                   |
| No of subjects              | 1149                | 752               | 786                   | 1115              |
| No of T2DM cases            | 90                  | 115               | 59                    | 146               |
| Person-years                | 7293.5              | 4546.8            | 5010.7                | 6829.6            |
| Incidence rate <sup>a</sup> | 12.3                | 25.3              | 11.8                  | 21.4              |
| HR (95% CI)                 | 1.00                | 2.10 (1.51-2.90)  | 1.00                  | 1.70 (1.20-2.41)  |
| <b>NGT (n=2447)</b>         |                     |                   |                       |                   |
| No of subjects              | 1556                | 891               | 1102                  | 1345              |
| No of T2DM cases            | 80                  | 65                | 49                    | 96                |
| Person-years                | 9887.2              | 5546.6            | 7024.0                | 8409.7            |
| Incidence rate <sup>a</sup> | 8.1                 | 11.7              | 7.0                   | 11.4              |
| HR (95% CI)                 | 1.00                | 1.13 (0.78-1.64)  | 1.00                  | 1.26 (0.85-1.88)  |

**Notes:** <sup>a</sup> 1000 person-year. Model: Adjusted for age, sex, body mass index, district, educational level, smoking consumption, drinking status, systolic blood pressure, diastolic blood pressure, total cholesterol, triglycerides, high-density lipoprotein cholesterol, low-density lipoprotein cholesterol and HbA<sub>1c</sub>.

**Abbreviations:** HR, hazard ratio; NGT, normal glucose tolerance; T2DM, type 2 diabetes mellitus.

Figure S1

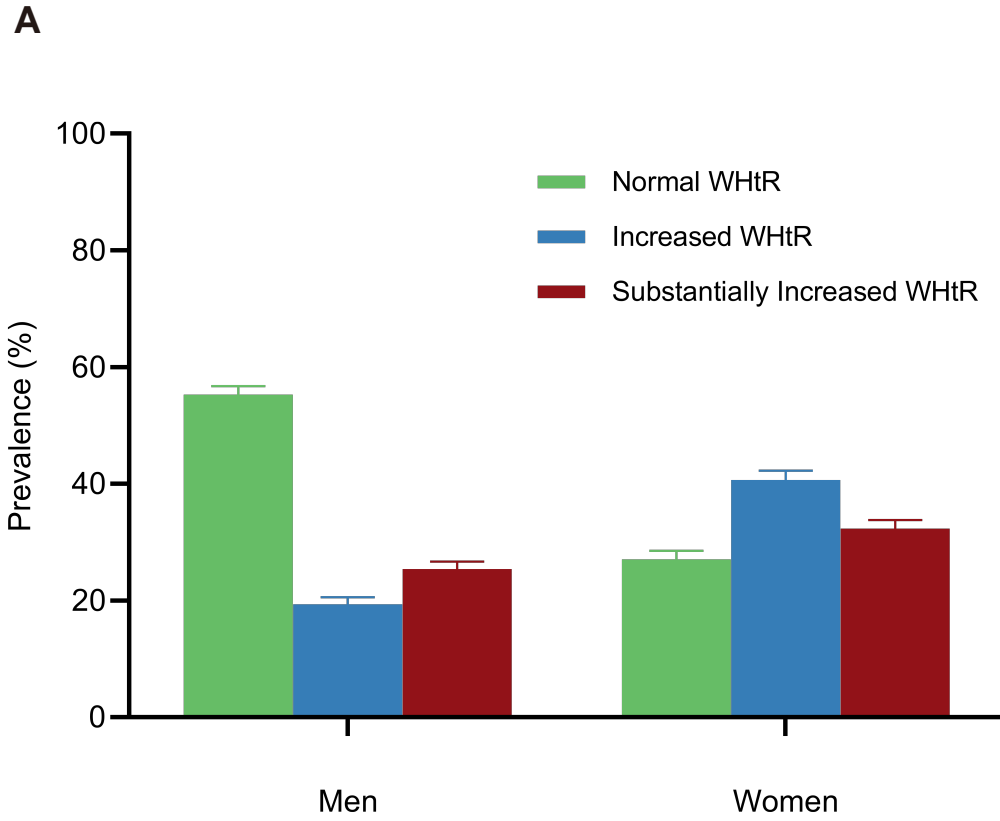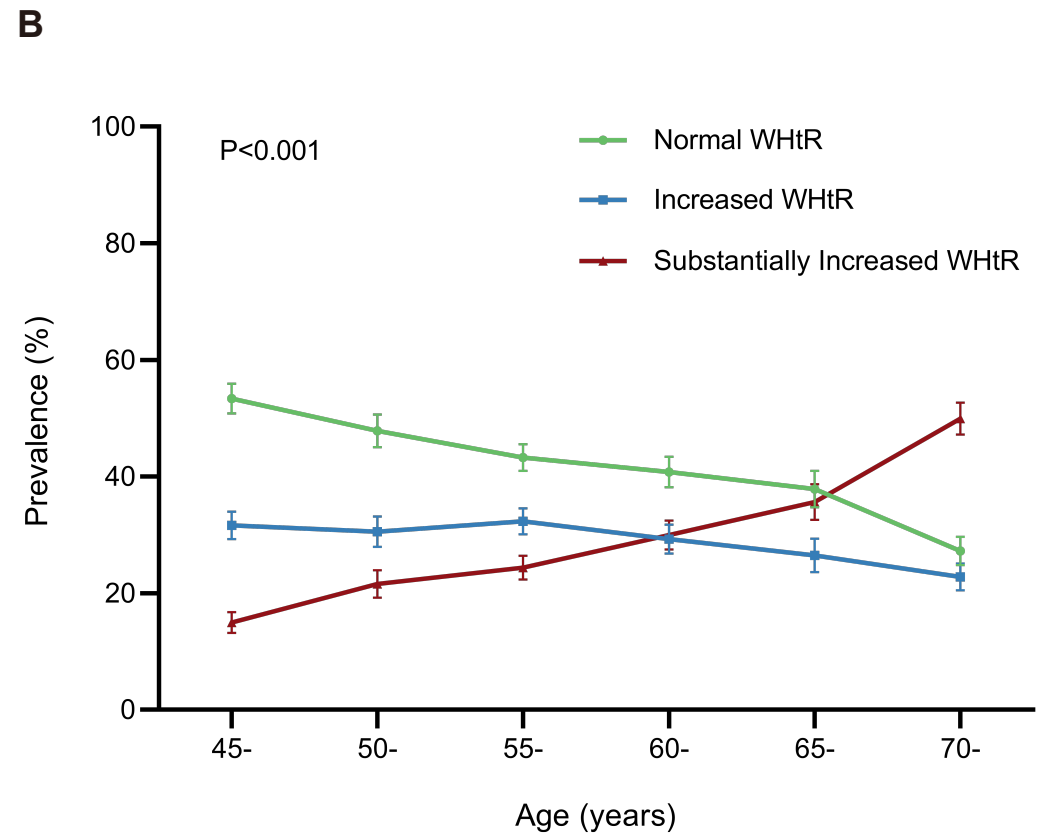

Figure S2

**A**

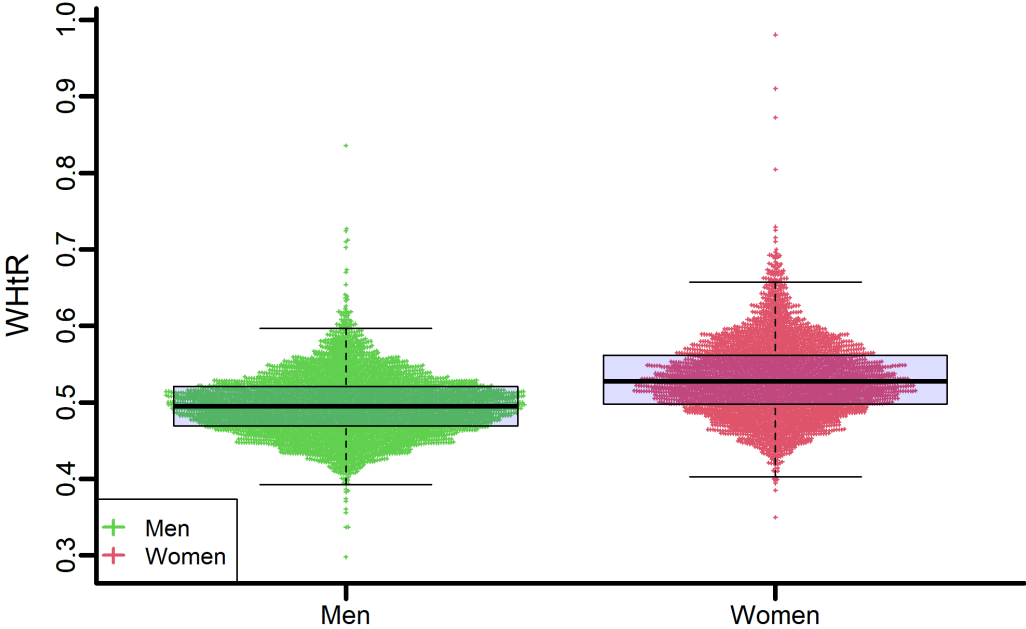

**B**

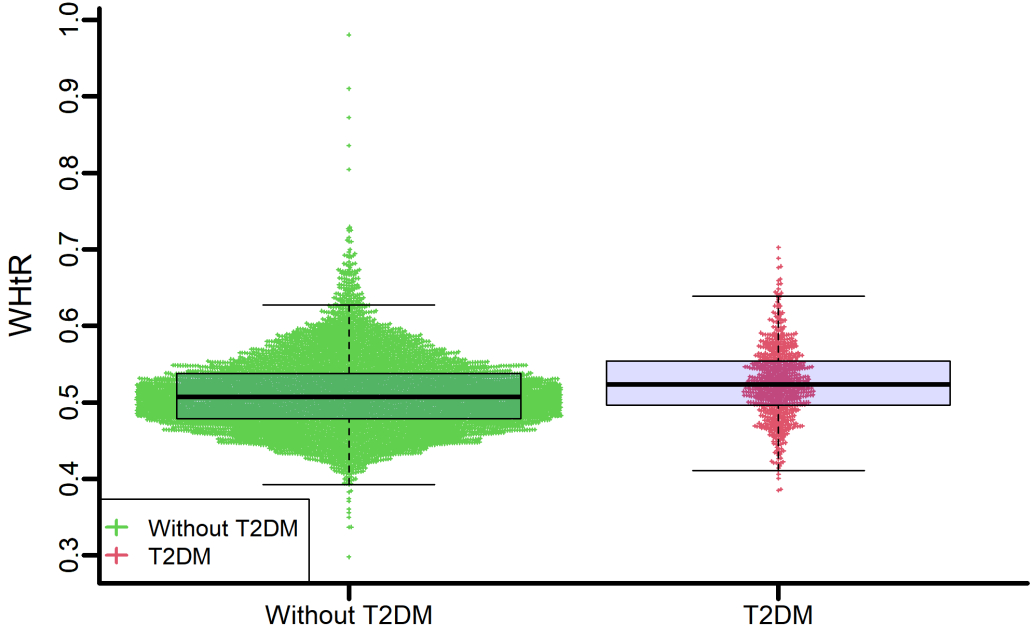



Figure S3

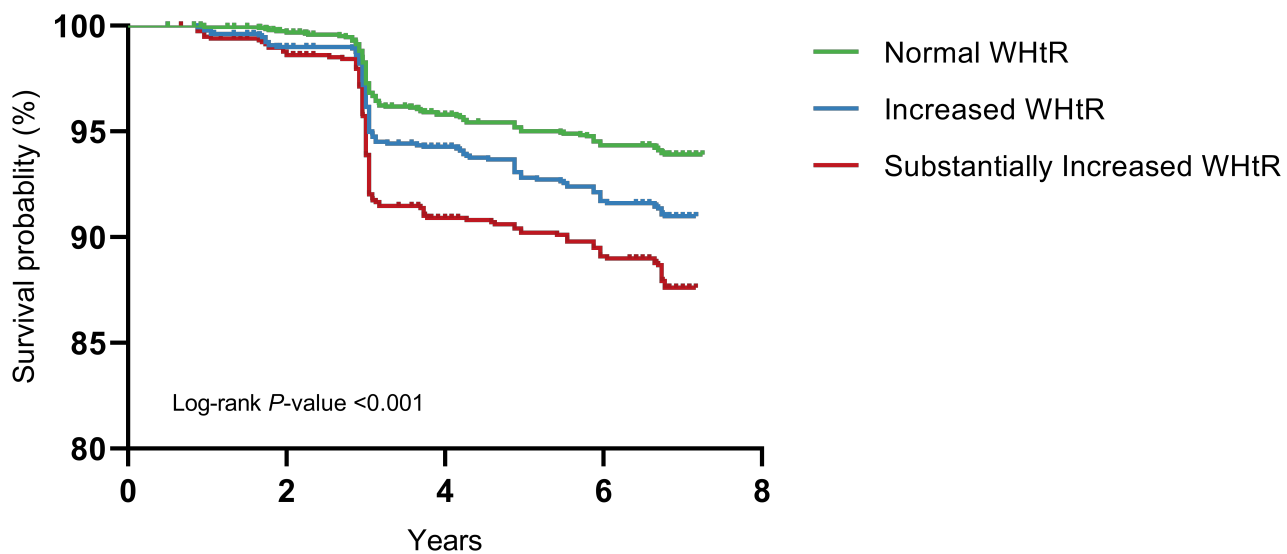

|                          |                              |      |      |      |      |
|--------------------------|------------------------------|------|------|------|------|
| No at risk               | Normal WHtR                  | 1888 | 1888 | 1859 | 1684 |
|                          | Increased WHtR               | 1305 | 1305 | 1274 | 1158 |
|                          | Substantially Increased WHtR | 1155 | 1155 | 1120 | 956  |
| Cum.censored             | Normal WHtR                  | 0    | 24   | 127  | 220  |
|                          | Increased WHtR               | 0    | 18   | 74   | 131  |
|                          | Substantially Increased WHtR | 0    | 21   | 100  | 157  |
| Cum.event                | Normal WHtR                  | 0    | 5    | 77   | 101  |
|                          | Increased WHtR               | 0    | 13   | 73   | 103  |
|                          | Substantially Increased WHtR | 0    | 14   | 99   | 117  |
| Survival probability (%) | Normal WHtR                  | 100  | 99.7 | 95.9 | 94.5 |
|                          | Increased WHtR               | 100  | 99.0 | 94.3 | 91.9 |
|                          | Substantially Increased WHtR | 100  | 98.8 | 91.3 | 89.6 |
